# Supplementary material
Source: PubMed Central journal article supplement (PMC8264460)

# Supplemental Figure 4

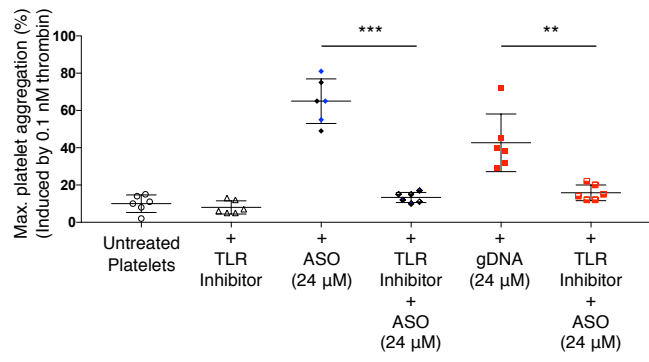

Supplement: NIHMS1711667-supplement-Supplemental_figure_4.pdf [file NIHMS1711667-supplement-Supplemental_figure_4.pdf]

Figure 1

A

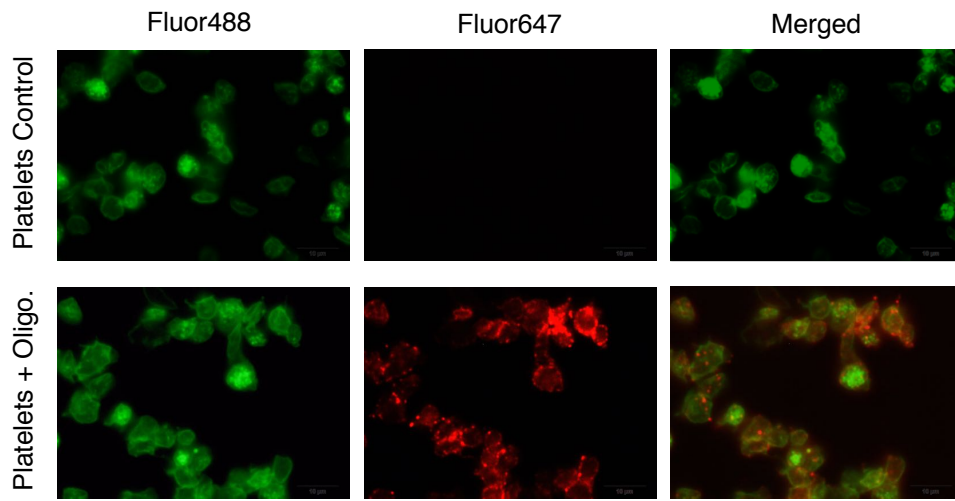

B

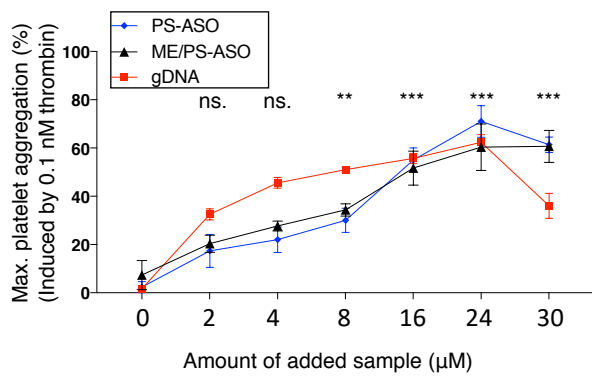

C

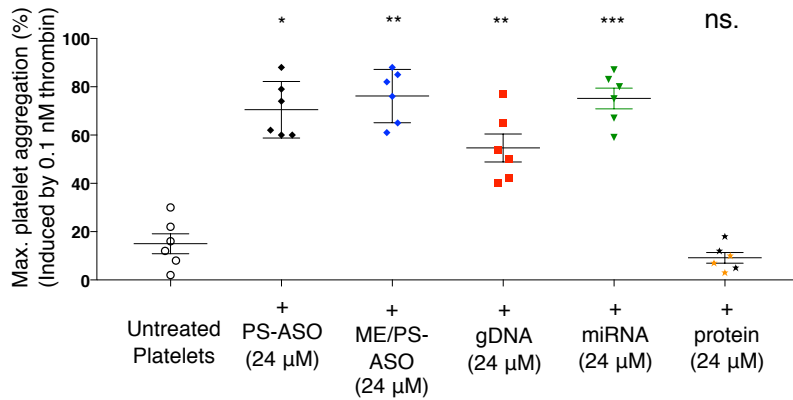

D

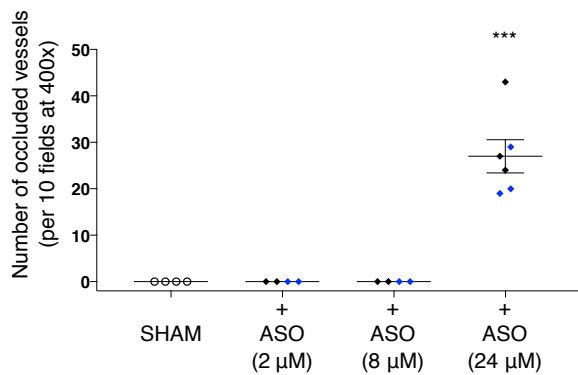

E

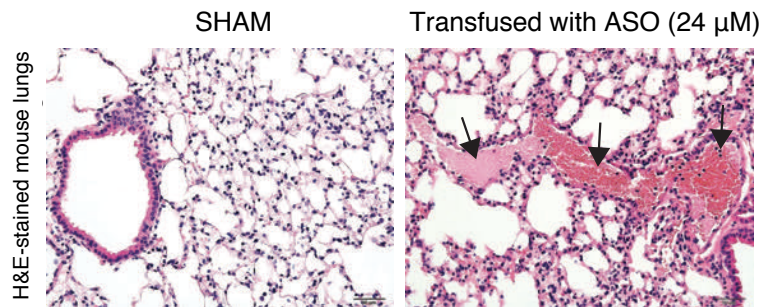

Supplement: NIHMS1711667-supplement-supplemental_figure_1.pdf [file NIHMS1711667-supplement-supplemental_figure_1.pdf]

# Supplemental Figure 2

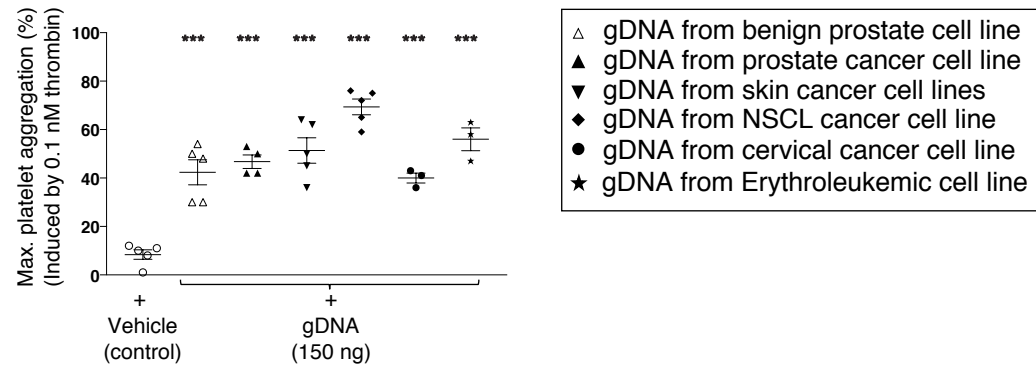

Supplement: NIHMS1711667-supplement-supplemental_figure_2.pdf [file NIHMS1711667-supplement-supplemental_figure_2.pdf]

# Supplemental Figure 3

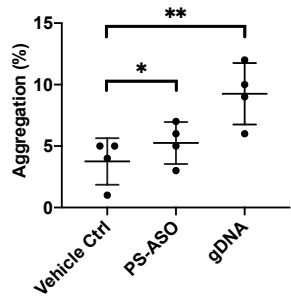

Supplement: NIHMS1711667-supplement-supplemental_figure_3.pdf [file NIHMS1711667-supplement-supplemental_figure_3.pdf]
